# Supplementary material for: Curcumin Reduces Pathological Endoplasmic Reticulum Stress through Increasing Proteolysis of Mutant Matrilin-3
Source: MDPI journal article supplement (doi:10.3390/ijms24021496), 2023-01-12
Supplement: s1 [file s1]

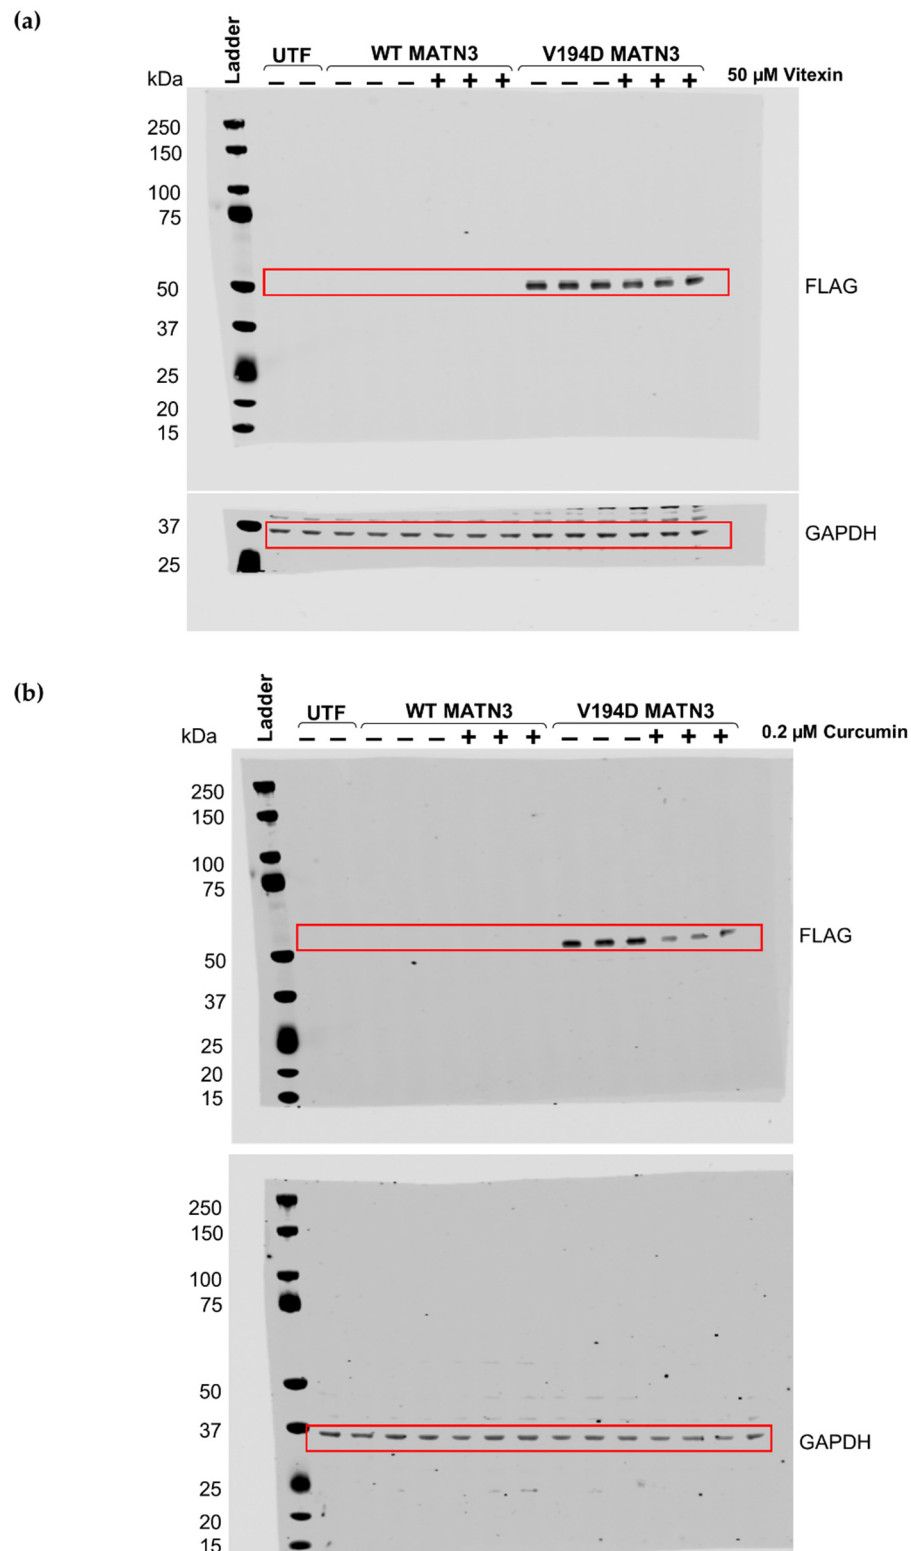

**Figure S1. Curcumin treatment reduces the intracellular accumulation of mutant matrilin-3.** Images of uncropped gels presented in Figure 3. Some membranes were cut prior to probing with antibodies. Cropped gels are highlighted by red box (Equal loading shown by GAPDH. FLAG: FLAG-tagged matrilin-3, GAPDH: Glyceraldehyde-3-phosphate dehydrogenase, MATN3: matrilin-3, WT: wild-type, UTF: Untransfected, n = 3).

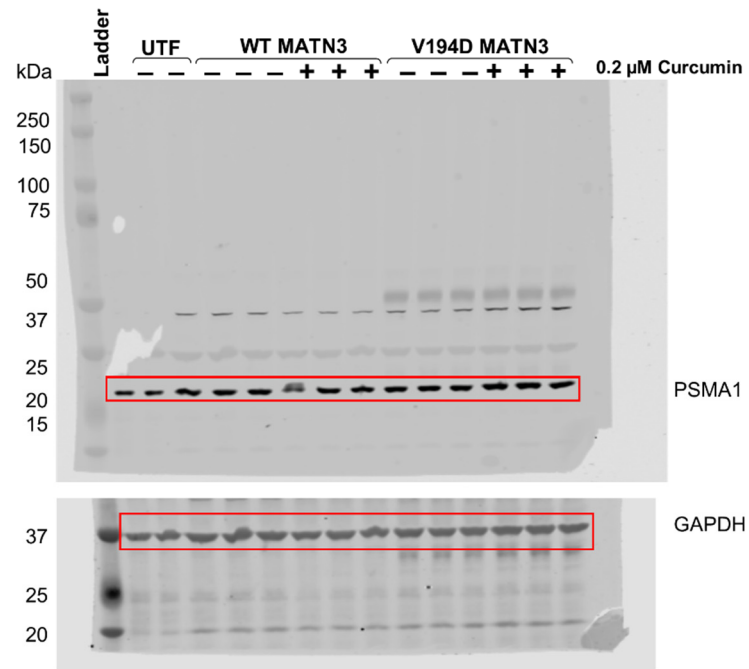

**Figure S2. Curcumin treatment upregulates proteasome expression in mutant matrilin-3 expressing cells.** Images of uncropped gels presented in Figure 6. Some membranes were cut prior to probing with antibodies. Cropped gels are highlighted by red box (Equal loading shown by GAPDH. PSMA1: Proteasomal subunit alpha-type 1, GAPDH: Glyceraldehyde-3-phosphate dehydrogenase, MATN3: matrilin-3, WT: wild-type, UTF: Untransfected, n = 3).

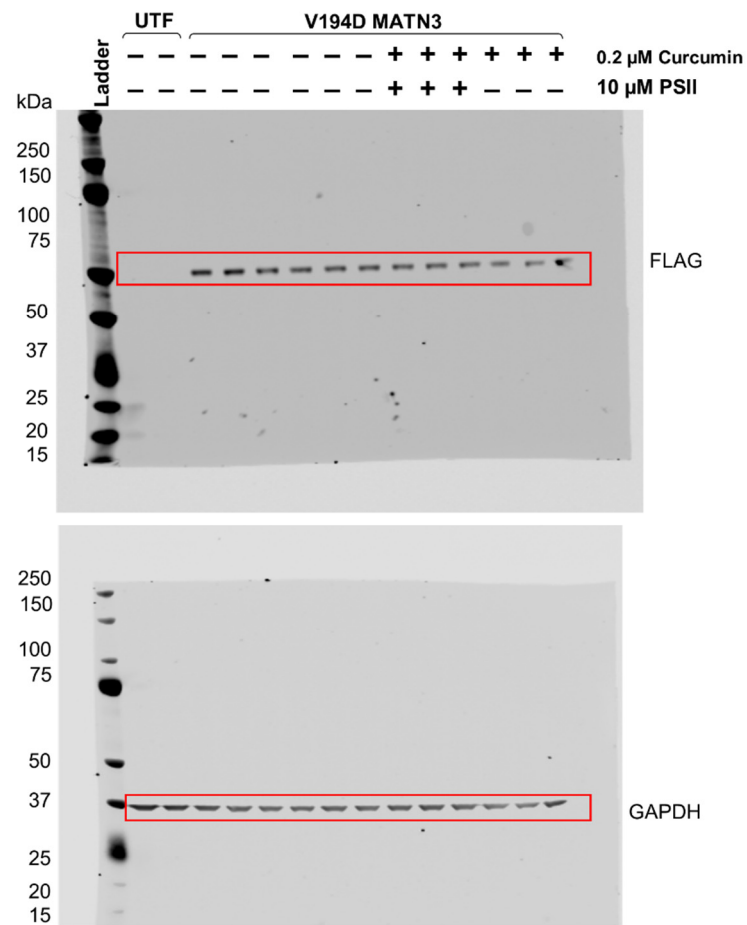

**Figure S3. Curcumin promotes proteasomal degradation of V194D mutant matrilin-3 in a cell model of EDM5.** Images of uncropped gels presented in Figure 7. Some membranes were cut prior to probing with antibodies. Cropped gels are highlighted by red box (Equal loading shown by GAPDH. FLAG: FLAG-tagged matrilin-3, GAPDH: Glyceraldehyde-3-phosphate dehydrogenase, MATN3: matrilin-3, PSII: Proteasome Inhibitor II, WT: wild-type, UTF: Untransfected, # significant to UTF, n = 3).

**Table S1. Quantitative PCR (qPCR) primer sequences.**

| Gene          | Primer Sequence               |                                |
|---------------|-------------------------------|--------------------------------|
|               | Forward                       | Reverse                        |
| <i>18S</i>    | 5'-GGCCCTGTAATTGGAATGAGTC-3'  | 5'-CCAAGATCCAACTACGAGCTT-3'    |
| <i>CANX</i>   | 5'-GCTGGTTAGATGATGAGCCTGAG-3' | 5'-ACACCACATCCAGGAGCTGAC T-3'  |
| <i>CRELD2</i> | 5'-AAACGGAAGATGCCTGTG-3'      | 5'-CTCAGGGCCACATTTTCCAC-3'     |
| <i>DERL1</i>  | 5'-CCCAATGGACTTGGGAGGAAGA-3'  | 5'-GGCACACCAAATCCTGATACTCC-3'  |
| <i>DERL2</i>  | 5'-GAAGAAGGCTCTTTCCGAGGTC-3'  | 5'-TCCACACATAGACGAGCATTATTG-3' |
| <i>EDEM1</i>  | 5'-ACGAGCAGTGAAAGCCCTTTGG-3'  | 5'-CCACTCTGCTTTCCAACCCAGT-3'   |
| <i>EDEM2</i>  | 5'-GATACACAGTGGAGAAGCGAGAG-3' | 5'-CAAATCCGCACTCCACCTTGCT-3'   |
| <i>GRP94</i>  | 5'-GGAGAGTCGTGAAGCAGTTGAG-3'  | 5'-CCACCAAAGCACACGGAGATTTC-3'  |
| <i>HSPA5</i>  | 5'-GCTAATGCTTATGGCCTGGA-3'    | 5'-CGCTGGTCAAAGTCTTCTCC-3'     |
| <i>MANF</i>   | 5'-TCACATTCTCACCAGCCACT-3'    | 5'-CAGGTGCGATCTGCTTGTCATAC-3'  |
| <i>MATN3</i>  | 5'-GAAGGCAAGCACCCTGTGAGT-3'   | 5'-GCACTCACAATGATAAGAGCCAC-3'  |
| <i>PDIA4</i>  | 5'-CCAGCAGGTTTGATGTGAGTGG-3'  | 5'-GGAGACTTCTCTGACCTTGGCA-3'   |
| <i>PDIA6</i>  | 5'-TCAGAAAGGCGAGTCTCCTGTG-3'  | 5'-CCTCTTGGCAATGTCCTCGTTG-3'   |
| <i>XPB1s</i>  | 5'-GAAGCCAAGGGGAATGAAGT-3'    | 5'-CCAGAATGCCCAACAGGATA-3'     |

**Table S2. Quantitative PCR (qPCR) cycling conditions.**

| Step                          | Temperature                                                                    | Time       |
|-------------------------------|--------------------------------------------------------------------------------|------------|
| 1.                            | 94 °C                                                                          | 2 minutes  |
| 2.                            | 94 °C                                                                          | 30 seconds |
| 3.                            | 60 °C                                                                          | 30 seconds |
| 4.                            | 72 °C                                                                          | 30 seconds |
| 5.                            | 72 °C                                                                          | 10 minutes |
| Steps 2-4 repeated x40 cycles |                                                                                |            |
| 6.                            | Melt curve from 55 °C to 95 °C,<br>Reading every 0.2 seconds,<br>Hold 00:00:01 |            |
